# Supplementary material for: Assessing Knowledge Performance for the Fast-Track Delivery of Sustainable Mobility Solutions
Source: MDPI journal article supplement (doi:10.3390/su16010039), 2023-12-19
Supplement: s1 [file s1]

Archive with 1 entries (1 files):
- sustainability-2739529-supplementary.pdf
