# Supplementary material for: Assessing Knowledge Performance for the Fast-Track Delivery of Sustainable Mobility Solutions
Source: MDPI journal article supplement (doi:10.3390/su16010039), 2023-12-19
Supplement: s1 [file s1 › sustainability-2739529-supplementary.pdf]

## Supplementary material for title: “Assessing Knowledge Performance for the Fast-Track Delivery of Sustainable Mobility Solutions”

**Table S1.** Information requested through the Event Forms [26].

| Category of requested information   | Requested information - questions                                                                                                                                                                                                                                                                                                                                                                                                                                                                                                                                                                                                     | LS for which the information was requested |
|-------------------------------------|---------------------------------------------------------------------------------------------------------------------------------------------------------------------------------------------------------------------------------------------------------------------------------------------------------------------------------------------------------------------------------------------------------------------------------------------------------------------------------------------------------------------------------------------------------------------------------------------------------------------------------------|--------------------------------------------|
| Event Information                   | Learning Sequence (1 to 5); Type of event (“cluster-based” or “for all”); Learning activity; Name; Date; Start/ End time; Organizer; Technical Support Partner; Second Technical Support Partner                                                                                                                                                                                                                                                                                                                                                                                                                                      | 1, 2, 3, 4                                 |
| Event attendance                    | Total number of partner participant; total number of participants from Local Affiliates; Number of stakeholders participants per category (private/ commercial bodies; public bodies; other guests)                                                                                                                                                                                                                                                                                                                                                                                                                                   | 1, 2, 3, 4                                 |
| Event Process                       | Technical problems during the event<br>How do you evaluate the easiness to handle all the (online) facilitation tools? (high, medium, low)<br>Organizational problems before/ during the event (i.e., non-registrations, delays in attendance)<br>Learning Material Distributed / Used (video, manual, report, presentations etc.)                                                                                                                                                                                                                                                                                                    | 1, 2, 3, 4                                 |
| Content and evaluation of learning  | Were there needs regarding the horizontal skill streams that came up during the event? If yes, please specify them below.<br>Did your event meaningfully involve other EU projects and networks (e.g., other CIVITAS projects), such as in a speaking, coaching or other advisory role, or making substantial use of their materials? If so, please state which project(s) and how.<br>To what extent were the learning needs of the LAs addressed by the event? (high, medium, low)<br>How do you evaluate the level of participation in your event (in terms of participants actively engaging in the process)? (high, medium, low) | 1, 2, 3, 4                                 |
| Suggestions for further improvement | Please share any suggestions you might for further improvement of similar events in the future (i.e., as far as methods, tools, etc. is concerned)                                                                                                                                                                                                                                                                                                                                                                                                                                                                                    | 1, 2, 3, 4                                 |

**Table S2.** Information requested through the Innovation Diaries [26].

| Category of requested information     | Requested information - questions                                                                                                                                                                                                                                                                                                                                                                                                                                                                                                                                                                                                                                                                                                                                                                                   | LS for which the information was requested |
|---------------------------------------|---------------------------------------------------------------------------------------------------------------------------------------------------------------------------------------------------------------------------------------------------------------------------------------------------------------------------------------------------------------------------------------------------------------------------------------------------------------------------------------------------------------------------------------------------------------------------------------------------------------------------------------------------------------------------------------------------------------------------------------------------------------------------------------------------------------------|--------------------------------------------|
| Personal information                  | Email; Full name; The city you are representing; The organization/ department you are working for; Focus of your work (engineering; transport planning; urban planning; architecture; public administration; business administration; law; other)                                                                                                                                                                                                                                                                                                                                                                                                                                                                                                                                                                   | 1, 2, 3, 4                                 |
| Insight from cities’ deployment plans | How innovative would you say is (are) the finally selected innovation(s)?<br>In your Deployment Plan you are listing the barriers that hinder the implementation of your innovative solution. Could you provide the following information for these barriers?<br>Which (new) data sources or (new) methodologies for data integration that you learnt during the Programme did you use for your Deployment Plan?<br>Has data collection for the implementation of your deployment plan been launched? Is yes, please specify the relevant data source for which data are collected<br>Have you received advice/ design input for your Deployment Plan from local actors that were not directly involved in the Programme? If yes, please provide information on the sector in which these local actors are occupied | 4<br>4<br>4<br>4<br>4                      |

|                                                                                   |                                                                                                                                                                                                                                                                                                     |            |
|-----------------------------------------------------------------------------------|-----------------------------------------------------------------------------------------------------------------------------------------------------------------------------------------------------------------------------------------------------------------------------------------------------|------------|
|                                                                                   | How do you stand now as far as the implementation of your FastTrack mobility innovation(s) (Deployment Plan) is concerned?                                                                                                                                                                          | 4          |
| Main challenges and expectations identified/ discussed during the learning period | In general, to what level the learning activities of this period allowed you to express your city's challenges and needs, as far as the deployment of innovative sustainable mobility solutions is concerned (low to high)?                                                                         | 1, 2, 3, 4 |
|                                                                                   | Which innovative idea would you like to develop towards implementation in the framework of the Programme?                                                                                                                                                                                           | 1, 2       |
|                                                                                   | Why do you need this innovation/ solution? What is/are the policy target(s) you want to address through this innovation (i.e., tackle congestion, reduce CO2 emissions, reduce noise, achieve social inclusion, increase safety, etc.)?                                                             | 1          |
|                                                                                   | What is/are your city challenge(s) discussed in the Programme activities of this period and related to the implementation of your innovative idea/solution?                                                                                                                                         | 1, 2,      |
|                                                                                   | What do you want to learn from the Programme in order to overcome the challenges related to the implementation of your innovative idea/ solution (part of them or all)?                                                                                                                             | 1, 2       |
|                                                                                   | Are there any other challenges and expectations that you weren't able to bring forward for discussion? If yes, please indicate them below.                                                                                                                                                          | 1, 3       |
|                                                                                   |                                                                                                                                                                                                                                                                                                     |            |
| Innovation offered by suppliers/ other cities                                     | Please identify and briefly describe at least one specific innovation/ solution that you have found particularly interesting during the learning activities of this period.                                                                                                                         | 1, 2       |
| Knowledge sharing and new synergies                                               | How do you perceive your city's knowledge on developing business/ operating plans for deployment of innovative transport solutions? (Likert scale from 1 to 5)                                                                                                                                      | 1, 4       |
|                                                                                   | How do you perceive your city's knowledge on data gathering, management and analysis? (Likert scale from 1 to 5)                                                                                                                                                                                    | 1, 2, 4    |
|                                                                                   | Were there any new, for you, data sources (i.e., mobility survey data, real time traffic data, floating car data, etc.) discussed during the learning activities of this period that triggered your interest in relation to the innovations identified above? If yes, please briefly describe them. | 1, 2       |
|                                                                                   | Have you already shared with the project partners or with other cities any open data of yours during the course of the project? If yes, please briefly explain the kind of data sources that you shared.                                                                                            | 4          |
|                                                                                   | How do you perceive your city's knowledge on governance in territorial planning? (Likert scale from 1 to 5)                                                                                                                                                                                         | 1, 2, 3, 4 |
|                                                                                   | Based on your previous interactions in the Programme, did you observe/ change/ influence the governance model in your city/ region? If yes, please briefly explain how.                                                                                                                             | 2, 4       |
|                                                                                   | Do you now have more information about governance issues related to your local innovative mobility solutions?                                                                                                                                                                                       | 3          |
|                                                                                   | How do you perceive your city's capacity on engaging citizens/ stakeholders in territorial planning? (Likert scale from 1 to 5)                                                                                                                                                                     | 1, 4       |
|                                                                                   | Based on your previous interactions in the Programme, did you try to improve the engagement activities with stakeholders and citizens? If yes, please briefly explain how.                                                                                                                          | 2, 4       |
|                                                                                   | What target group will you be interested in engaging for your local innovative mobility solutions (multiple choices are available)?                                                                                                                                                                 | 3          |
|                                                                                   | How do you perceive your city's overall capacity for selecting innovative mobility solutions? (Likert scale from 1 to 5)                                                                                                                                                                            | 1, 4       |
|                                                                                   | How do you perceive your city's overall capacity for implementing innovative mobility solutions? (Likert scale from 1 to 5)                                                                                                                                                                         | 1, 4       |
|                                                                                   | How do you perceive your knowledge on funding/ business/ operating plans for deployment of innovative transport solutions, after the end of this CBW? (Likert scale from 1 to 5)                                                                                                                    | 3          |
|                                                                                   |                                                                                                                                                                                                                                                                                                     |            |
|                                                                                   |                                                                                                                                                                                                                                                                                                     |            |

|                                             |                                                                                                                                                                                                                                                                                                                                 |         |
|---------------------------------------------|---------------------------------------------------------------------------------------------------------------------------------------------------------------------------------------------------------------------------------------------------------------------------------------------------------------------------------|---------|
|                                             | Do you now see more opportunities for funding of your local innovative mobility solutions?                                                                                                                                                                                                                                      | 3       |
|                                             | Do you see the opportunity for greater collaboration with a private or public organization you were in touch with during this period?                                                                                                                                                                                           | 1       |
|                                             | How do you perceive your knowledge on technicalities and skills aspects for deployment of innovative transport solutions, after the end of this CBW? (Likert scale from 1 to 5)                                                                                                                                                 | 3       |
|                                             | Do you now have more information about the technical specifications and skills needed for your local innovative mobility solutions?                                                                                                                                                                                             | 3       |
|                                             | Have you made any new collaborations with a private or public organization you were in touch with during this period? If yes, please provide more information on the type of collaboration established in your case.                                                                                                            | 2       |
|                                             | Do you now see the opportunity for or have you reached greater internal collaboration in your local government?                                                                                                                                                                                                                 | 1, 2, 4 |
|                                             | Have you reached greater collaboration with other public authorities in your Functional Urban Area due to your participation in the Programme?                                                                                                                                                                                  | 4       |
|                                             | Have you reached out to colleagues from your city/ region administration that are occupied outside the mobility sector for sharing the Programme knowledge with them?                                                                                                                                                           | 3       |
|                                             | Did you establish links with other EU projects and networks that can help you deploy innovations due to the learning activities of this period? If yes, please shortly indicate the EU project and/ or network with which the link is established and how this link will help you with the deployment of your innovative ideas. | 1, 2, 4 |
|                                             | Has your city developed new proposals/ projects (i.e., EU or national) based on the knowledge (and networking) gained through the Programme? If yes, please briefly describe the proposal and the type of funds (if any) linked to it.                                                                                          | 4       |
|                                             | Is your city currently actively connected with the Partnership on Smart Cities and Communities (EIP-SCC) initiative (i.e., signing up as partner or actively participating)? If yes, what is the type of this connection?                                                                                                       | 1, 2    |
|                                             | Is your city currently actively connected with the European Institute of Innovation and Technology (EIT) initiative (i.e., signing up as partner or actively participating)? If yes, what is the type of this connection?                                                                                                       | 1, 2, 4 |
|                                             | During the learning activities (and through the connection of the project with CIVITAS ELEVATE and sister projects) has your city became a CIVITAS member?                                                                                                                                                                      | 4       |
|                                             | During the learning activities, has your city connected with the Partnership on Smart Cities and Communities (EIP-SCC) initiative (i.e., signing up as partner or actively participating)?                                                                                                                                      | 4       |
|                                             | Did the Programme help you improve the approach towards and with external partners/ experts?                                                                                                                                                                                                                                    | 4       |
|                                             | Cities have the possibility to apply to the project for finance for springboard studies (collecting evidence or conducting analysis as a basis for firm deployment plan priorities). Would you like to apply to a share of the activity fund? If yes, please briefly indicate the purpose for doing so.                         | 1, 2    |
|                                             | What indicators will be measured in order to assess the impact of your innovative mobility solutions?                                                                                                                                                                                                                           | 3       |
| Project dissemination/ outreach/ engagement | From the beginning of your involvement in the Programme, have you reached out to colleagues from your city/ region administration for sharing the Program's knowledge with them?                                                                                                                                                | 4       |
|                                             | Have you presented your innovative mobility solution or your involvement in FastTrack to your (local) communities and relevant (local) events?                                                                                                                                                                                  | 4       |
|                                             | Are you willing to remain engaged in the project's network after its end?                                                                                                                                                                                                                                                       | 4       |

|                                                        |                                                                                                                                                                                                                                                                 |            |
|--------------------------------------------------------|-----------------------------------------------------------------------------------------------------------------------------------------------------------------------------------------------------------------------------------------------------------------|------------|
| Learning expectations from the next project activities | What do you expect from the Programme during its upcoming learning events?                                                                                                                                                                                      | 1, 2       |
|                                                        | What kind of funding / financing/ business models would you like to learn for deploying your mobility innovations?                                                                                                                                              | 2          |
|                                                        | Please describe any (self-learning) action that will be undertaken by your and/or your city administration until the next Capacity Building Week and will further help you in the rapid deployment of the innovative solution you have chosen in the Programme. | 1, 2       |
|                                                        | Are there any additional requests regarding data gathering, management and analysis that you would like the Programme to address following CBW3?                                                                                                                | 3          |
|                                                        | Are there any additional requests regarding governance issues that you would like the Programme to address following CBW3?                                                                                                                                      | 3          |
| Final reflections                                      | In general, how satisfied are you with the new knowledge obtained from FastTrack activities? (Likert scale from 1 to 5)                                                                                                                                         | 4          |
|                                                        | In general, how do you perceive the usefulness of the knowledge received from the project? (Likert scale from 1 to 5)                                                                                                                                           | 4          |
|                                                        | In general, how do you perceive the quality of the structure of FastTrack learning programme? (Likert scale from 1 to 5)                                                                                                                                        | 4          |
|                                                        | Are there any thoughts/ suggestions for improvement that you would like to share regarding the above (i.e., collaboration with FastTrack partners)?                                                                                                             | 4          |
|                                                        | This space is for you to add any personal reflections you might like to share with the project's study team or note down to remind yourself of your state of thinking at this stage in the project.                                                             | 1, 2, 3, 4 |
